# Supplementary material for: Metabolomics Reveals Changes in Metabolite Profiles among Pre-Diapause, Diapause and Post-Diapause Larvae of Sitodiplosis mosellana (Diptera: Cecidomyiidae)
Source: MDPI journal article supplement (doi:10.3390/insects13040339), 2022-03-30
Supplement: s1 [file s1]

**Table S1.** Metabolites identified from pre-diapause, diapause and post-diapause larvae of *Sitodiplosis mosellana*.

| Amino acids (29)    | Sugars and polyols (22)   | TCA intermediates (4)       | Fatty acids (4) | Organic acids (16)       | Others (19)                     |
|---------------------|---------------------------|-----------------------------|-----------------|--------------------------|---------------------------------|
| Proline             | Trehalose                 | Fumaric acid                | Oleic acid      | Pantothenic acid         | Phosphate                       |
| Alanine             | Trehalose 6-phosphate     | Malic acid                  | Linoleic acid   | Lactic acid              | Methyl phosphate                |
| Threonine           | Glucose                   | Citric acid                 | Palmitic acid   | Oxalic acid              | Glycerol- 1-phosphate           |
| Leucine             | Glucose-1-phosphate       | $\alpha$ -Ketoglutaric acid | Stearic acid    | Malonic acid             | Inosine                         |
| Isoleucine          | Fructose 1,6-bisphosphate |                             |                 | Galactonic acid          | Inosine 5'-monophosphate        |
| Valine              | Maltose                   |                             |                 | Citramalic acid          | $\alpha$ -Ecdysone              |
| Glycine             | Isomaltose                |                             |                 | Phosphoglycolic acid     | Putrescine                      |
| Serine              | Lyxose                    |                             |                 | Phosphogluconic acid     | $\beta$ -Mannosylglycerate      |
| Tryptophan          | Lactose                   |                             |                 | 3-Aminoisobutyric acid   | Urea                            |
| Lysine              | Tagatose                  |                             |                 | Hydroxyphenylacetic acid | Uridine                         |
| Phenylalanine       | Lactulose                 |                             |                 | Aminooxyacetic acid      | Uracil                          |
| Tyrosine            | Talose                    |                             |                 | Aminomalonic acid        | Uric acid                       |
| Methionine          | Ribose 5-phosphate        |                             |                 | 2,4-Diaminobutyric acid  | Glycocyamine                    |
| Cystine             | Ribulose 5-phosphate      |                             |                 | Dehydroascorbic acid     | Hydroxylamine                   |
| Asparagine          | Glycerol                  |                             |                 | Pentadecanoic acid       | Adenosine 5-monophosphate       |
| Glutamine           | Sorbitol                  |                             |                 | Pyruvic acid             | 2-Hydroxypyridine               |
| $\beta$ -Alanine    | Mannitol                  |                             |                 |                          | 7- $\alpha$ -Hydroxycholesterol |
| Glutamic acid       | myo-Inositol              |                             |                 |                          | $\beta$ -Glycerophosphoric acid |
| Ornithine           | Xylitol                   |                             |                 |                          | Cholecalciferol                 |
| Citrulline          | Galactinol                |                             |                 |                          |                                 |
| Oxoproline          | Palatinitol               |                             |                 |                          |                                 |
| Norleucine          | Diglycerol                |                             |                 |                          |                                 |
| Cysteine            |                           |                             |                 |                          |                                 |
| Homoserine          |                           |                             |                 |                          |                                 |
| Allothreonine       |                           |                             |                 |                          |                                 |
| Phosphoserine       |                           |                             |                 |                          |                                 |
| N-acetyl-L-leucine  |                           |                             |                 |                          |                                 |
| 3-Hydroxy-L-proline |                           |                             |                 |                          |                                 |
| 4-Aminobutyric acid |                           |                             |                 |                          |                                 |

**Table S2.** Significantly different metabolites in diapause (D), post-diapause quiescence (PDQ) and developing (PDD) larvae of *Sitosiplosis mosellnana* compared to pre-diapause (PreD).

| Metabolites                | D/PreD |        |      | PDQ/PreD |        |      | PDD/PreD |        |      |
|----------------------------|--------|--------|------|----------|--------|------|----------|--------|------|
|                            | FC     | P      | VIP  | FC       | P      | VIP  | FC       | P      | VIP  |
| Amino acids (20)           |        |        |      |          |        |      |          |        |      |
| Alanine                    | 2.28   | <0.001 | 1.32 | 2.55     | <0.001 | 1.29 |          |        |      |
| Proline                    | 2.00   | <0.001 | 1.83 | 4.82     | <0.001 | 1.39 |          |        |      |
| 4-Aminobutyric acid (GABA) | 0.06   | <0.001 | 1.33 | 0.09     | <0.001 | 1.25 | 0.10     | <0.001 | 1.28 |
| Cysteine                   | 0.07   | <0.001 | 1.35 | 0.13     | <0.001 | 1.27 | 0.17     | <0.001 | 1.31 |
| Asparagine                 | 0.08   | <0.001 | 1.31 | 0.41     | <0.001 | 1.10 |          |        |      |
| Threonine                  | 0.08   | <0.001 | 1.33 | 0.10     | <0.001 | 1.24 | 0.38     | <0.001 | 1.25 |
| Glycine                    | 0.09   | <0.001 | 1.35 | 0.11     | <0.001 | 1.28 | 0.49     | <0.001 | 1.18 |
| Phenylalanine              | 0.13   | <0.001 | 1.33 | 0.22     | <0.001 | 1.21 |          |        |      |
| Leucine                    | 0.20   | <0.001 | 1.34 | 0.25     | <0.001 | 1.19 |          |        |      |
| Serine                     | 0.22   | <0.001 | 1.33 | 0.26     | <0.001 | 1.24 |          |        |      |
| Isoleucine                 | 0.31   | <0.001 | 1.32 | 0.29     | <0.001 | 1.20 |          |        |      |
| Methionine                 | 0.34   | 0.002  | 1.20 | 0.35     | 0.002  | 1.13 |          |        |      |
| β-Alanine                  | 0.37   | <0.001 | 1.44 | 2.52     | <0.001 | 1.67 | 2.52     | <0.001 | 1.39 |
| Glutamine                  | 0.38   | <0.001 | 1.36 | 2.88     | <0.001 | 1.59 | 0.38     | <0.001 | 1.42 |
| Allothreonine              | 0.39   | <0.001 | 1.31 | 0.38     | <0.001 | 1.16 |          |        |      |
| Glutamic acid              |        |        |      | 0.38     | 0.003  | 1.07 | 0.36     | 0.002  | 1.13 |
| Tryptophan                 |        |        |      |          |        |      | 3.52     | <0.001 | 1.33 |
| Cystine                    |        |        |      |          |        |      | 3.33     | <0.001 | 1.23 |
| Ornithine                  |        |        |      |          |        |      | 3.28     | <0.001 | 1.16 |
| Lysine                     |        |        |      |          |        |      | 2.58     | <0.001 | 1.23 |
| Sugars and polyols (19)    |        |        |      |          |        |      |          |        |      |
| Trehalose 6-phosphate      | 321.53 | <0.001 | 1.48 | 298.06   | <0.001 | 1.63 | 144.52   | <0.001 | 1.65 |
| Trehalose                  | 4.65   | <0.001 | 1.65 | 11.56    | <0.001 | 1.44 | 2.16     | <0.001 | 1.73 |
| Ribulose 5-phosphate       | 2.35   | <0.001 | 1.46 | 4.95     | <0.001 | 1.11 | 10.74    | 0.006  | 1.35 |
| Talose                     | 0.03   | <0.001 | 1.36 | 0.06     | <0.001 | 1.25 | 0.30     | <0.001 | 1.29 |
| Maltose                    | 0.05   | <0.001 | 1.29 | 0.04     | <0.001 | 1.23 | 0.38     | 0.012  | 1.06 |
| Isomaltose                 | 0.06   | <0.001 | 1.30 | 0.07     | <0.001 | 1.20 | 0.19     | <0.001 | 1.22 |
| Lyxose                     | 0.13   | <0.001 | 1.35 | 0.13     | <0.001 | 1.28 | 0.33     | <0.001 | 1.30 |
| Tagatose                   | 0.13   | <0.001 | 1.33 | 0.20     | <0.001 | 1.23 | 0.29     | <0.001 | 1.26 |
| Fructose 1,6-bisphosphate  | 0.16   | <0.001 | 1.33 | 0.18     | <0.001 | 1.27 | 0.38     | <0.001 | 1.26 |

Table S2. *Continued.*

| Metabolites            | D/PreD |        |      | PDQ/PreD |        |      | PDD/PreD |        |      |
|------------------------|--------|--------|------|----------|--------|------|----------|--------|------|
|                        | FC     | P      | VIP  | FC       | P      | VIP  | FC       | P      | VIP  |
| Lactose                | 0.25   | <0.001 | 1.33 | 0.33     | <0.001 | 1.25 | 0.37     | <0.001 | 1.27 |
| Glucose-1-phosphate    | 0.35   | <0.001 | 1.33 | 0.38     | <0.001 | 1.25 |          |        |      |
| Glucose                | 0.37   | <0.001 | 1.33 | 0.38     | <0.001 | 1.23 |          |        |      |
| Mannitol               | 56.45  | <0.001 | 1.49 | 50.25    | <0.001 | 1.88 | 9.84     | <0.001 | 1.67 |
| Glycerol               | 10.50  | <0.001 | 1.31 | 12.31    | <0.001 | 1.48 | 4.54     | <0.001 | 1.32 |
| Palatinitol            | 3.19   | <0.001 | 1.07 | 3.52     | <0.001 | 1.08 |          |        |      |
| Galactinol             | 0.03   | <0.001 | 1.31 | 0.02     | <0.001 | 1.25 | 0.06     | <0.001 | 1.25 |
| Xylitol                | 0.04   | <0.001 | 1.33 | 0.06     | <0.001 | 1.26 | 0.36     | <0.001 | 1.20 |
| Myo-inositol           | 0.40   | <0.001 | 1.14 | 0.30     | 0.002  | 1.17 | 0.05     | <0.001 | 1.30 |
| Diglycerol             | 0.33   | <0.001 | 1.24 | 0.33     | 0.002  | 1.03 |          |        |      |
| TCA intermediates (4)  |        |        |      |          |        |      |          |        |      |
| α-Ketoglutaric acid    | 0.03   | <0.001 | 1.40 | 0.46     | <0.001 | 1.92 | 2.01     | <0.001 | 1.58 |
| Fumaric acid           | 0.19   | <0.001 | 1.58 | 0.01     | <0.001 | 1.41 | 0.39     | <0.001 | 1.78 |
| Citric acid            | 0.38   | <0.001 | 1.73 | 0.45     | <0.001 | 1.68 |          |        |      |
| Malic acid             | 0.48   | <0.001 | 1.41 |          |        |      | 0.19     | <0.001 | 1.43 |
| Fatty acids (4)        |        |        |      |          |        |      |          |        |      |
| Linoleic acid          | 3.91   | 0.006  | 1.43 | 4.46     | 0.005  | 1.42 |          |        |      |
| Oleic acid             | 4.40   | <0.001 | 1.32 | 4.84     | <0.001 | 1.43 |          |        |      |
| Stearic acid           | 0.17   | <0.001 | 1.24 | 0.16     | <0.001 | 1.37 | 0.49     | <0.001 | 1.23 |
| Palmitic acid          | 0.18   | <0.001 | 1.37 | 0.14     | <0.001 | 1.50 |          |        |      |
| Organic acids (5)      |        |        |      |          |        |      |          |        |      |
| Pyruvic acid           | 3.17   | <0.001 | 1.36 | 8.75     | <0.001 | 1.43 | 8.69     | <0.001 | 1.61 |
| Pantothenic acid       | 4.86   | <0.001 | 1.28 | 4.40     | <0.001 | 1.26 | 4.85     | <0.001 | 1.30 |
| Galactonic acid        | 0.01   | <0.001 | 1.35 | 0.01     | <0.001 | 1.28 | 0.03     | <0.001 | 1.31 |
| Lactic acid            | 0.13   | <0.001 | 1.33 | 0.15     | <0.001 | 1.40 | 0.37     | <0.001 | 1.39 |
| 6-Phosphogluconic acid | 0.16   | <0.001 | 1.30 | 0.46     | <0.001 | 1.28 |          |        |      |
| Others (2)             |        |        |      |          |        |      |          |        |      |
| Uracil                 | 0.39   | <0.001 | 1.16 | 0.25     | <0.001 | 1.29 | 0.13     | <0.001 | 1.31 |
| Urea                   | 0.23   | 0.002  | 1.18 | 0.21     | <0.001 | 1.23 |          |        |      |

The fold change (FC) value was based on comparison of the means of peak intensity of six replicates between two groups. *P* values are obtained from student's *t*-test. VIP is variable importance in the projection of OPLS-DA model. The same for Table S3.

**Table S3.** Significantly different metabolites of pairwise comparisons between diapause (D), post-diapause quiescence (PDQ) and developing larvae (PDD) of *Sitotiplosis mosellana*.

| Metabolites               | PDQ/D |        |      | PDD/D |        |      | PDD/PDQ |        |      |
|---------------------------|-------|--------|------|-------|--------|------|---------|--------|------|
|                           | FC    | P      | VIP  | Fold  | P      | VIP  | Fold    | P      | VIP  |
| Amino acids (18)          |       |        |      |       |        |      |         |        |      |
| Glutamine                 | 7.47  | <0.001 | 1.59 |       |        |      | 0.13    | <0.001 | 1.56 |
| β-Alanine                 | 6.84  | <0.001 | 1.42 | 6.88  | <0.001 | 1.64 |         |        |      |
| Asparagine                | 5.25  | <0.001 | 1.22 | 13.75 | <0.001 | 1.28 | 2.62    | <0.001 | 1.13 |
| Proline                   | 2.41  | <0.001 | 1.67 |       |        |      | 0.23    | <0.001 | 1.32 |
| Phenylalanine             |       |        |      | 6.62  | <0.001 | 1.29 | 3.86    | <0.001 | 1.21 |
| Glycine                   |       |        |      | 5.25  | <0.001 | 1.30 | 4.52    | <0.001 | 1.24 |
| Ornithine                 |       |        |      | 4.97  | <0.001 | 1.14 | 5.82    | <0.001 | 1.13 |
| Threonine                 |       |        |      | 4.82  | <0.001 | 1.13 | 3.80    | <0.001 | 1.15 |
| Leucine                   |       |        |      | 4.60  | <0.001 | 1.28 | 3.65    | <0.001 | 1.17 |
| Serine                    |       |        |      | 3.48  | <0.001 | 1.28 | 2.89    | <0.001 | 1.22 |
| Lysine                    |       |        |      | 3.42  | <0.001 | 1.24 | 2.60    | <0.001 | 1.15 |
| Tryptophan                |       |        |      | 3.28  | <0.001 | 1.29 | 2.82    | <0.001 | 1.10 |
| Isoleucine                |       |        |      | 2.89  | <0.001 | 1.27 | 3.11    | <0.001 | 1.15 |
| Methionine                |       |        |      | 2.61  | <0.001 | 1.17 | 2.58    | <0.001 | 1.23 |
| Cystine                   |       |        |      | 2.46  | <0.001 | 1.14 | 2.16    | <0.001 | 1.07 |
| Cysteine                  |       |        |      | 2.33  | <0.001 | 1.18 |         |        |      |
| Allothreonine             |       |        |      | 2.00  | <0.001 | 1.08 | 2.04    | <0.001 | 1.03 |
| Alanine                   |       |        |      | 0.48  | <0.001 | 1.32 | 0.43    | <0.001 | 1.25 |
| Sugars and polyols (18)   |       |        |      |       |        |      |         |        |      |
| Trehalose                 | 2.48  | <0.001 | 1.53 | 0.46  | <0.001 | 1.35 | 0.19    | <0.001 | 1.35 |
| Ribulose 5-phosphate      | 2.11  | <0.001 | 1.23 | 4.58  | <0.001 | 1.12 | 2.17    | <0.001 | 1.22 |
| Talose                    |       |        |      | 9.19  | <0.001 | 1.31 | 5.03    | <0.001 | 1.15 |
| Maltose                   |       |        |      | 7.02  | <0.001 | 1.23 | 8.97    | <0.001 | 1.18 |
| Isomaltose                |       |        |      | 3.32  | <0.001 | 1.13 | 2.71    | <0.001 | 1.06 |
| Glucose                   |       |        |      | 2.78  | <0.001 | 1.23 | 2.70    | <0.001 | 1.24 |
| Glucose 1-phosphate       |       |        |      | 2.74  | <0.001 | 1.25 | 2.53    | <0.001 | 1.13 |
| Lyxose                    |       |        |      | 2.62  | <0.001 | 1.26 | 2.61    | <0.001 | 1.15 |
| Fructose 1,6-bisphosphate |       |        |      | 2.41  | <0.001 | 1.25 | 2.17    | <0.001 | 1.24 |
| Xylitol                   |       |        |      | 9.66  | <0.001 | 1.28 | 5.82    | <0.001 | 1.20 |

Table S3. *Continued.*

| Metabolites                 | PDQ/D |        |      | PDD/D |        |      | PDD/PDQ |        |      |
|-----------------------------|-------|--------|------|-------|--------|------|---------|--------|------|
|                             | FC    | P      | VIP  | Fold  | P      | VIP  | Fold    | P      | VIP  |
| Diglycerol                  |       |        |      | 2.79  | <0.001 | 1.28 | 2.75    | <0.001 | 1.20 |
| Galactinol                  |       |        |      | 2.40  | <0.001 | 1.30 | 2.74    | <0.001 | 1.32 |
| Tagatose                    |       |        |      | 2.30  | <0.001 | 1.23 |         |        |      |
| Myo-inositol                |       |        |      | 0.13  | <0.001 | 1.42 | 0.17    | <0.001 | 1.39 |
| Mannitol                    |       |        |      | 0.17  | <0.001 | 1.59 | 0.20    | <0.001 | 1.67 |
| Palatinitol                 |       |        |      | 0.32  | <0.001 | 1.28 | 0.29    | <0.001 | 1.17 |
| Glycerol                    |       |        |      | 0.43  | <0.001 | 1.27 | 0.37    | <0.001 | 1.63 |
| Trehalose 6-phosphate       |       |        |      | 0.45  | <0.001 | 1.73 | 0.48    | <0.001 | 1.30 |
| TCA intermediates (4)       |       |        |      |       |        |      |         |        |      |
| $\alpha$ -Ketoglutaric acid | 14.20 | <0.001 | 1.42 | 61.90 | <0.001 | 1.38 | 4.36    | <0.001 | 1.61 |
| Fumaric acid                | 0.05  | <0.001 | 1.43 | 2.07  | <0.001 | 1.32 | 40.73   | <0.001 | 1.28 |
| Citric acid                 |       |        |      | 2.92  | <0.001 | 1.63 | 2.48    | <0.001 | 1.47 |
| Malic acid                  |       |        |      | 2.22  | <0.001 | 1.39 | 2.19    | <0.001 | 1.53 |
| Fatty acids (4)             |       |        |      |       |        |      |         |        |      |
| Palmitic acid               |       |        |      | 3.99  | <0.001 | 1.64 | 4.90    | <0.001 | 1.33 |
| Stearic acid                |       |        |      | 2.89  | <0.001 | 1.38 | 3.14    | <0.001 | 1.52 |
| Oleic acid                  |       |        |      | 0.16  | <0.001 | 1.41 | 0.15    | <0.001 | 1.65 |
| Linoleic acid               |       |        |      | 0.24  | <0.001 | 1.57 | 0.21    | <0.001 | 1.59 |
| Organic acids (4)           |       |        |      |       |        |      |         |        |      |
| 6-Phosphogluconic acid      | 2.92  | <0.001 | 1.14 | 6.10  | <0.001 | 1.23 | 2.09    | <0.001 | 1.20 |
| Galactonic acid             |       |        |      | 4.49  | <0.001 | 1.15 | 2.35    | <0.001 | 1.22 |
| Lactic acid                 |       |        |      | 2.88  | <0.001 | 1.22 | 2.57    | <0.001 | 1.43 |
| Pyruvic acid                | 2.76  | <0.001 | 1.56 | 2.74  | <0.001 | 1.58 |         |        |      |
| Others (2)                  |       |        |      |       |        |      |         |        |      |
| Urea                        |       |        |      | 2.69  | <0.001 | 1.32 | 2.80    | <0.001 | 1.19 |
| Uracil                      |       |        |      | 0.33  | <0.001 | 1.20 |         |        |      |

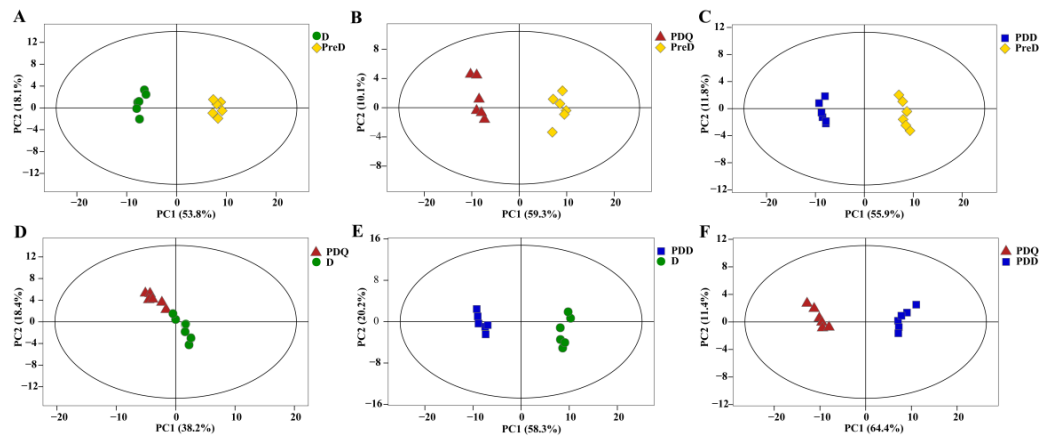

**Figure S1.** Principal component analysis (PCA) score plots of the metabolic profiles of pair comparisons of the four groups, including pre-diapause (PreD), diapause (D), post-diapause quiescence (PDQ) and post-diapause developmental larvae (PDD) of *Sitodiplosis mosellana*.
